# Supplementary material for: Hydrogel-driven paper-based microfluidics
Source: Royal Society of Chemistry journal article supplement (doi:10.1039/c5lc00276a), 2015-01-01
Supplement: c5lc00276a1.pdf [file c5lc00276a1.pdf]

## Supplementary Information

### Hydrogel-driven paper-based microfluidics

Robert R. Niedl and Carsten Beta

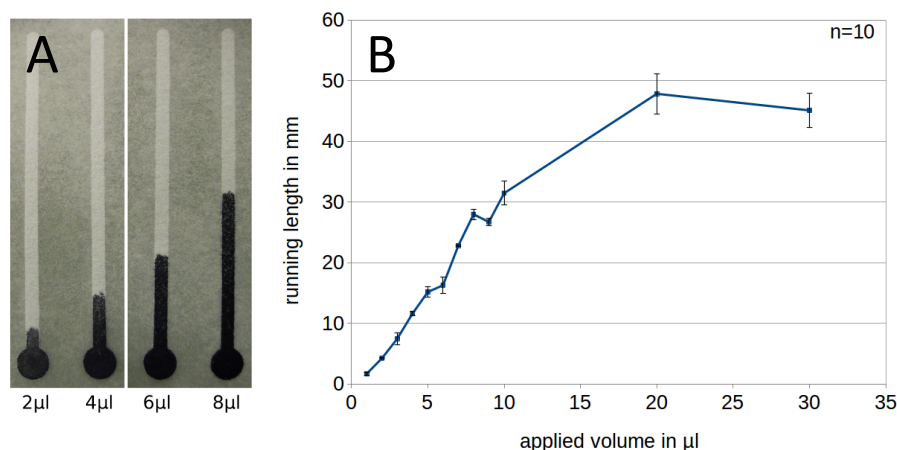

**Figure S1.** Fluid run length in a paper-based microfluidic channel depending on the applied fluid volume. (A) Images showing a microchannel (48mm long and 2mm wide) that was supplied with different volumes of black ink (linear regime). (B) Fluid run length along the channel shown in (A) as a function of the applied liquid volume. Mean values and standard deviations are shown, measurements were repeated 10 times. For volumes below 10  $\mu\text{l}$  the run length increases linear with the applied volume. Above 10  $\mu\text{l}$ , the run length saturates due to increased evaporation of the applied liquid.

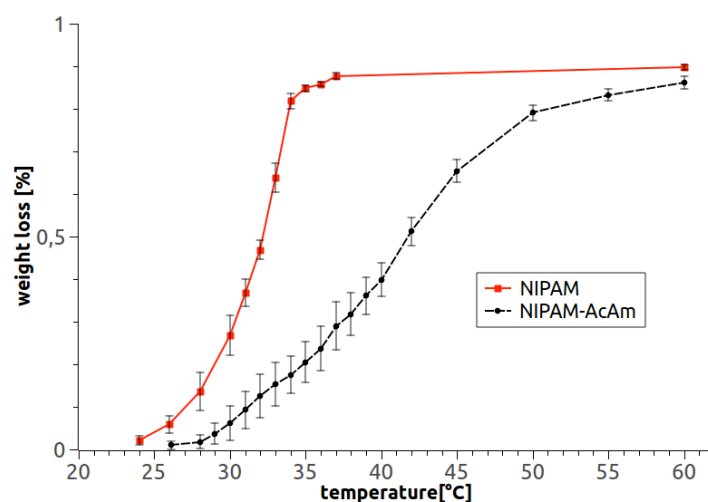

**Figure S2.** Collapse characteristics of the pure NIPAM hydrogel in comparison to the composite NIPAM-AcAm hydrogel in a bulk experiment. The weight loss due to liquid release is plotted as a function of temperature. Mean values and standard deviations are shown, the measurements were repeated 8 times.
